# Supplementary material for: On the aggregative behavior of 4-O-Methyl-D-Glucurono-D-Xylan in aqueous solution: from optimized solvation at hot temperature to cold gelation
Source: Research Square preprint supplement (doi:10.21203/rs.3.rs-8724368/v1), 2026-02-20
Supplement: Supplementary file 1 [file 54bebeecf772e9679cda472c.docx]

# **Supporting information**

## FT-IR spectrum


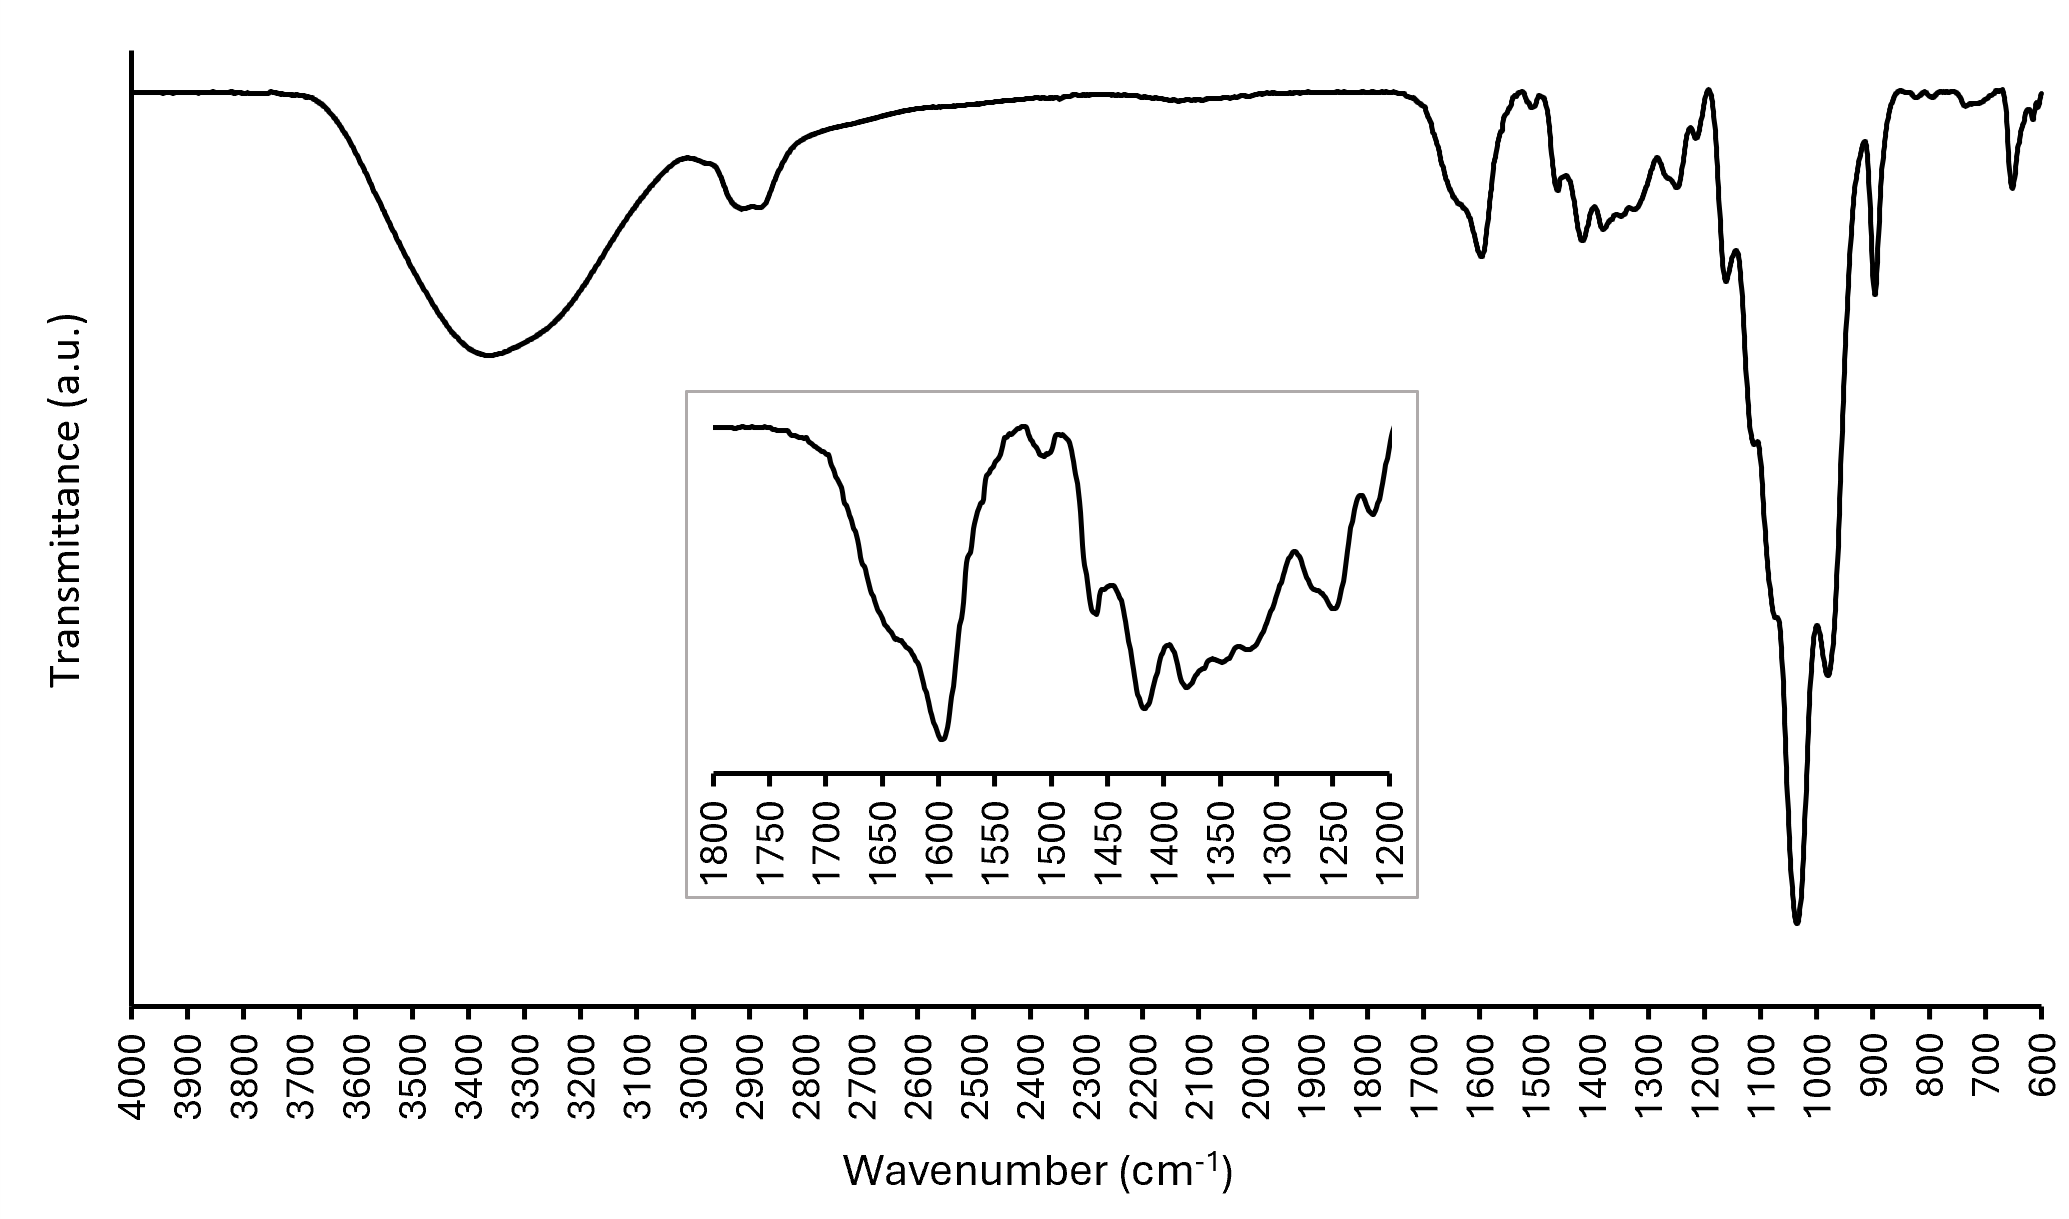


Figure SI 1: MGX infrared spectrum (attenuated total reflectance mode)

## NMRAnalysis


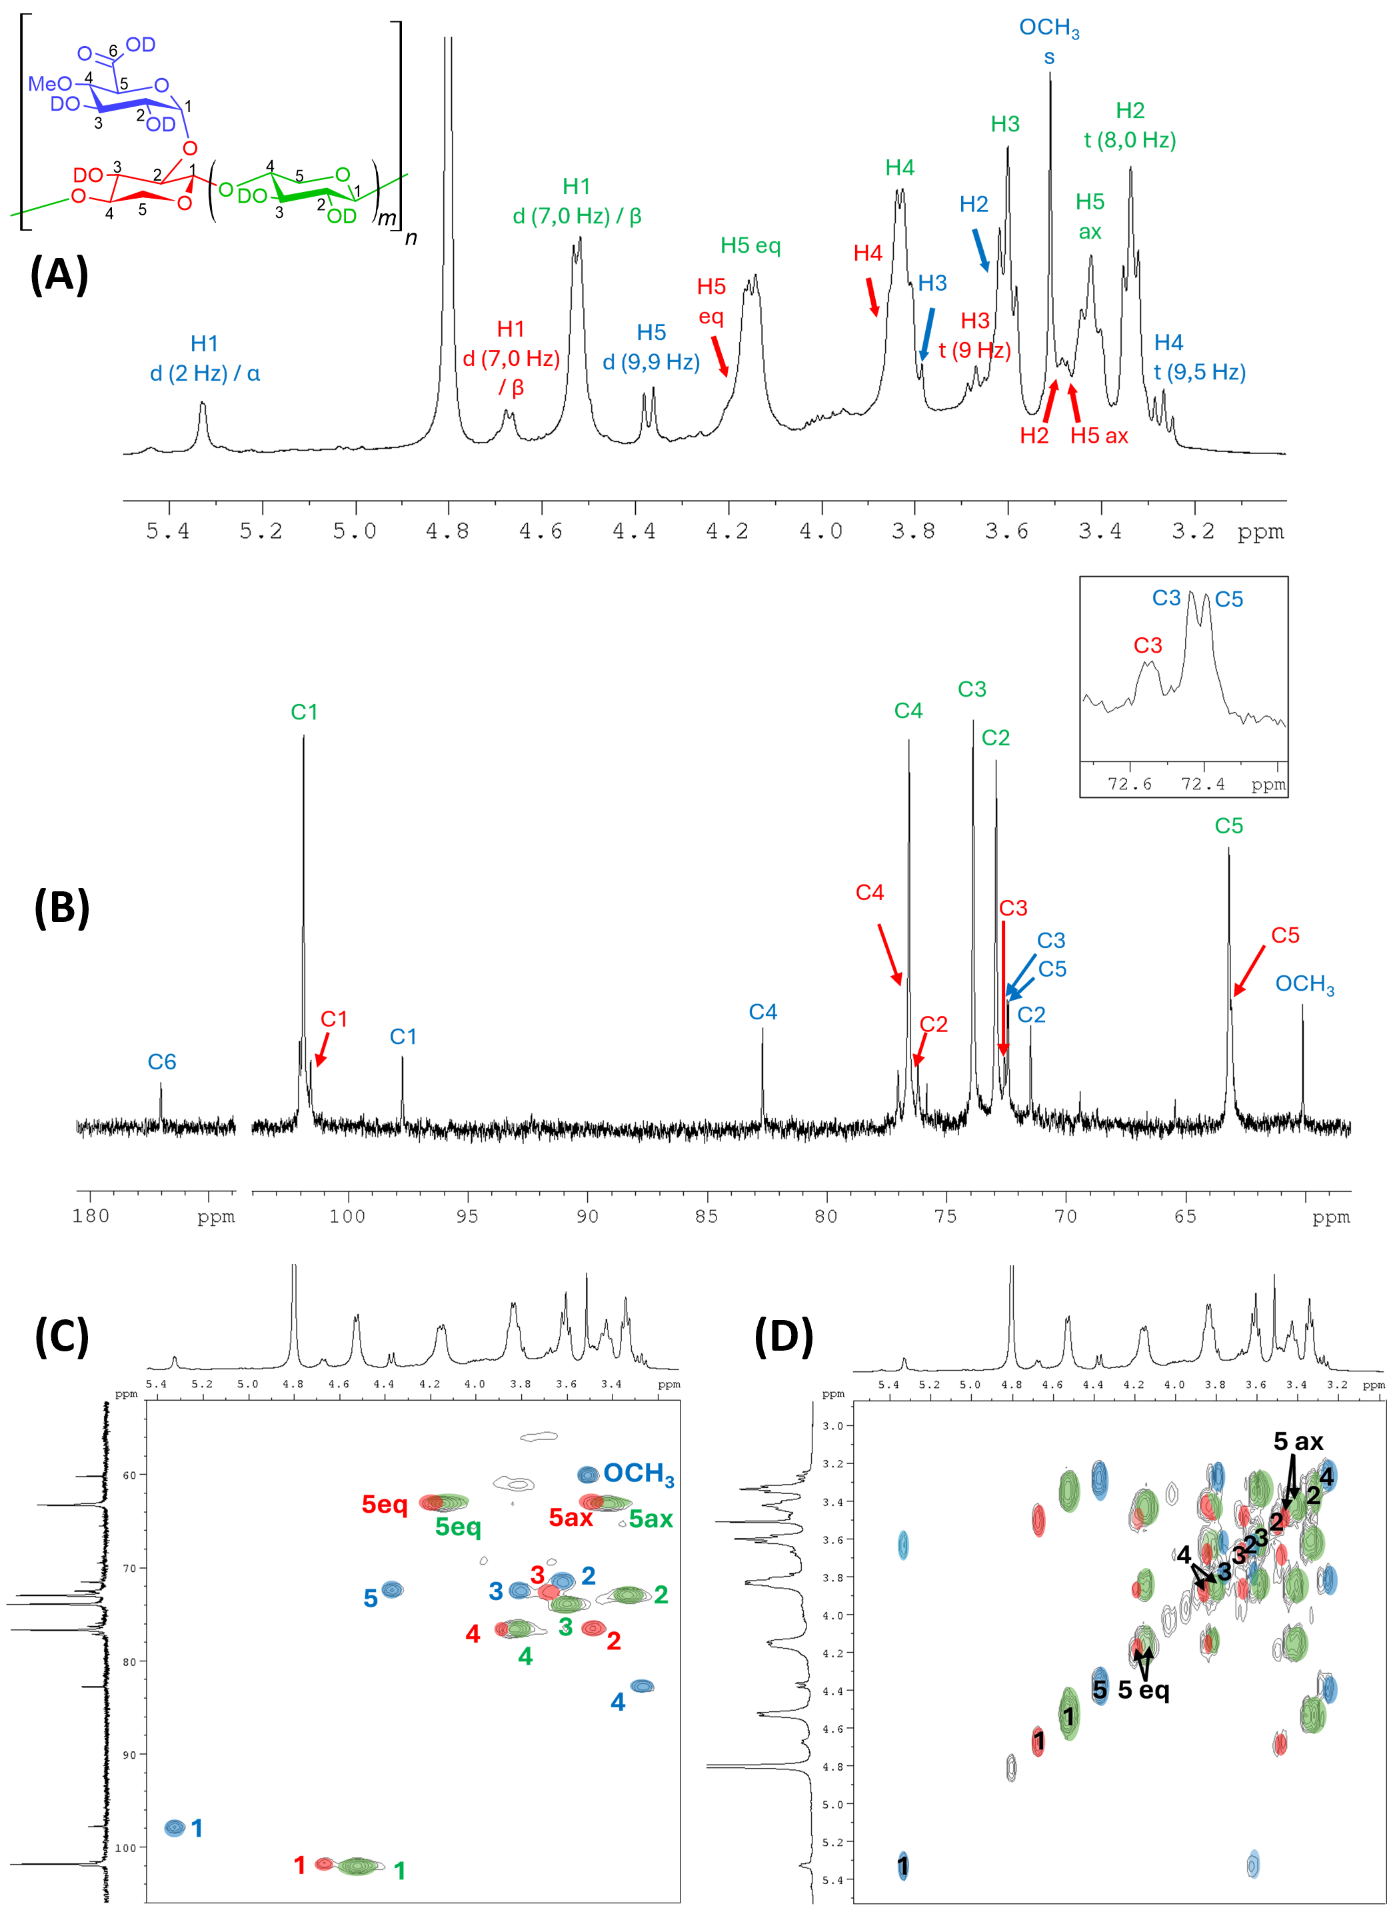


Figure SI 2: NMR analysis (in D2O) of MGX. (A) 1H NMR (B) 13C NMR. ax = axial; eq = equatorial; s = singlet; d = doublet; t = triplet; α = alpha configuration of the anomeric carbon; β = beta configuration of the anomeric carbon.

Table SI 1: Chemical shifts of protons and carbons of the three constituent elements of 4-O-methylglucuronoxylan.

| **Protons and carbons (ppm)** | | | | **unsubstituted**  **xylose** | | | | | **Substituted**  **Xylose** | | | | **4-O-methylglucuronique Acide** | |
| --- | --- | --- | --- | --- | --- | --- | --- | --- | --- | --- | --- | --- | --- | --- |
| **H1** | | **C1** | | 4.52 | | 101.87 | | | 4.67 | | 101.57 | | 5.33 | 97.73 |
| **H2** | | **C2** | | 3.34 | | | 72.90 | | 3.49 | | ≈ 76.5 | | 3.62 | 71.46 |
| **H3** | | **C3** | | 3.60 | | | 73.86 | | 3.67 | | 72,54 | | 3.80 | 72.44 |
| **H4** | | **C4** | | 3.83 | | | 76.55 | | 3.85 | | ≈ 76.6 | | 3.27 | 82.67 |
| **H5 ax** | **H5 eq** | | **C5** | 3.42 | 4.15 | | | 63.17 | 3.46 | 4.20 | | 63.1 | 4.37 | 72.39 |
| **C6** | | | |  | | | | | | | | | 177.01 | |
| **H(OMe)** | | **C(OMe)** | | 3,51 | 60,08 |

## Development of substitution degree of ferulic acid (equation (2)):

From equation (2) the molar concentration of MGX solution can be determined by equation (4):

|  | (4) |
| --- | --- |

With CmMGX-FA, the concentration in g.L-1 of analysed samples and MMGX-FA, the molar mass of the repeated unit of MGX-FA

The development of MMGX-FA according to equation (5):

|  | (5) |
| --- | --- |
|  |  |

With MXylose, the molar mass of xylose unit, DSUA et MUA, respectively the substitution degree and the molar mass of uronic acid, DSFA et MFA, respectively the substitution degree and the molar mass of ferulic acid, and MOH and MH2O the molar mass of an alcohol and water released.

The development of equation (2) by equation (4) enabled to obtain equation (6):

|  | (6) |
| --- | --- |

With equation (5), equation (6) can be develop to obtain the substitution degree of ferulic acid on the MGX backbone with equation (7):

|  | (7) |
| --- | --- |

## SEC/MALS/DRI/Viscometer

Figure SI 3: Molar masses distribution with suitable linearization of lyophilized (red) and atomized (blue) MGX sample at 2 g/L-1 in 0.1 M LiNO3 (stirred for 6 h at 20 °C). DRI (―), light scattering (---), molar mass (●).

Table SI 2: Results of SEC/MALS/DRI/Visco analyses of lyophilized and atomized MGX at 2 g.L-1 after solvation at 20 °C for 6 hours in LiNO3 0.1 M.

|  | Mn  (g.mol-1) | Mw  (g.mol-1) | Đ | Rhw (nm) | Recovery (%) | Mass fraction (%) |
| --- | --- | --- | --- | --- | --- | --- |
| Atomized |  |  |  |  |  |  |
| Pop 1 + Pop 2 | 156 000 | 4 545 000 | 29 | 19.4 | 62.6 | 100 |
| Pop 1 | 12 000 000 | 20 000 000 | 1.7 | 52.7 | 13.5 | 21.6 |
| Pop 2 | 124 000 | 205 000 | 1.6 | 10 | 49.1 | 78.4 |
| Lyophilized |  |  |  |  |  |  |
| Pop 1 + Pop 2 | 4 640 000 | 9 800 000 | 2.1 | 41.8 | 61.5 | 100 |
| Pop 1 | 8 200 000 | 12 900 000 | 1.6 | 49.5 | 42.5 | 69.2 |
| Pop 2 | 2 380 000 | 2 860 000 | 1.2 | 24.6 | 19 | 30.8 |

SEC/MALS/VD/DRI data accuracy: Mn 5 %; Mw 0.3 %; Ð 5 %; Rhw  5.5 %.
